# 1 Non-dichotomous inference using bootstrapped evidence

2

3 *D. Samuel Schwarzkopf*

4 Experimental Psychology, University College London, 26 Bedford Way, London WC1H 0AP, United Kingdom &

5 Institute of Cognitive Neuroscience, University College London, 17 Queen Square, London, WC1N 3AR, United Kingdom

6 Email: <mailto:s.schwarzkopf@ucl.ac.uk>

7

## 8 Abstract

9

10 The problems with classical frequentist statistics are well established, yet the enthusiasm of  
11 researchers to adopt alternatives like Bayesian inference remains modest. Here I present the  
12 *bootstrapped evidence test*, an objective resampling procedure that takes the precision with  
13 which both the experimental and null hypothesis can be estimated into account. Simulations and  
14 reanalysis of actual experimental data demonstrate that this test minimizes false positives while  
15 maintaining sensitivity. It is equally applicable to a wide range of situations and thus minimizes  
16 problems arising from analytical flexibility. Critically, it does not dichotomize the results based on  
17 an arbitrary significance level but instead quantifies how well the data support either the  
18 alternative or the null hypothesis. It is thus particularly useful in situations with considerable  
19 uncertainty about the expected effect size. Because it is non-parametric, it is also robust to severe  
20 violations of assumptions made by classical statistics.

21

## 22 Introduction

23

24 To this day classical null hypothesis significance testing (NHST) remains the dominant approach  
25 for inferring the validity of an observed result in the life sciences. It rests on the probability ('p-  
26 value') that the observed effect, or a more extreme one, could have occurred under the  
27 assumption that there is no population effect. If the p-value is sufficiently low, this null hypothesis  
28 is rejected. However, p-values are frequently misinterpreted by researchers, uninformative about  
29 the evidence *for* an experimental hypothesis, highly susceptible to biased data sampling  
30 strategies, and generally prone to false positives (Cohen, 1994; Wagenmakers, 2007;  
31 Wagenmakers et al., 2011b; Masicampo and Lalande, 2012; Cumming, 2014; Colquhoun, 2014;  
32 Halsey et al., 2015; Trafimow and Marks, 2015; Gigerenzer and Marewski, 2015; Gigerenzer, 2004;  
33 Nuzzo, 2014). The most devastating effect of NHST may be that it encourages an artificial  
34 dichotomy between significant and non-significant results (Cumming, 2014).

35

36 The scatter plots in Figure 1 illustrate the problems with p-values. Figure 1A shows an almost  
37 perfect correlation between two measures ( $r=0.995$ ,  $p<0.0004$ ). However, there are only five  
38 observations. In contrast, the data in Figure 1B are clearly correlated even though the correlation  
39 is weaker. Yet the p-value is similar ( $r=0.535$ ,  $p<0.0004$ ) because the sample size is much larger.  
40 Surely the evidence for a correlation in the second example is more compelling and more likely to  
41 replicate?

42

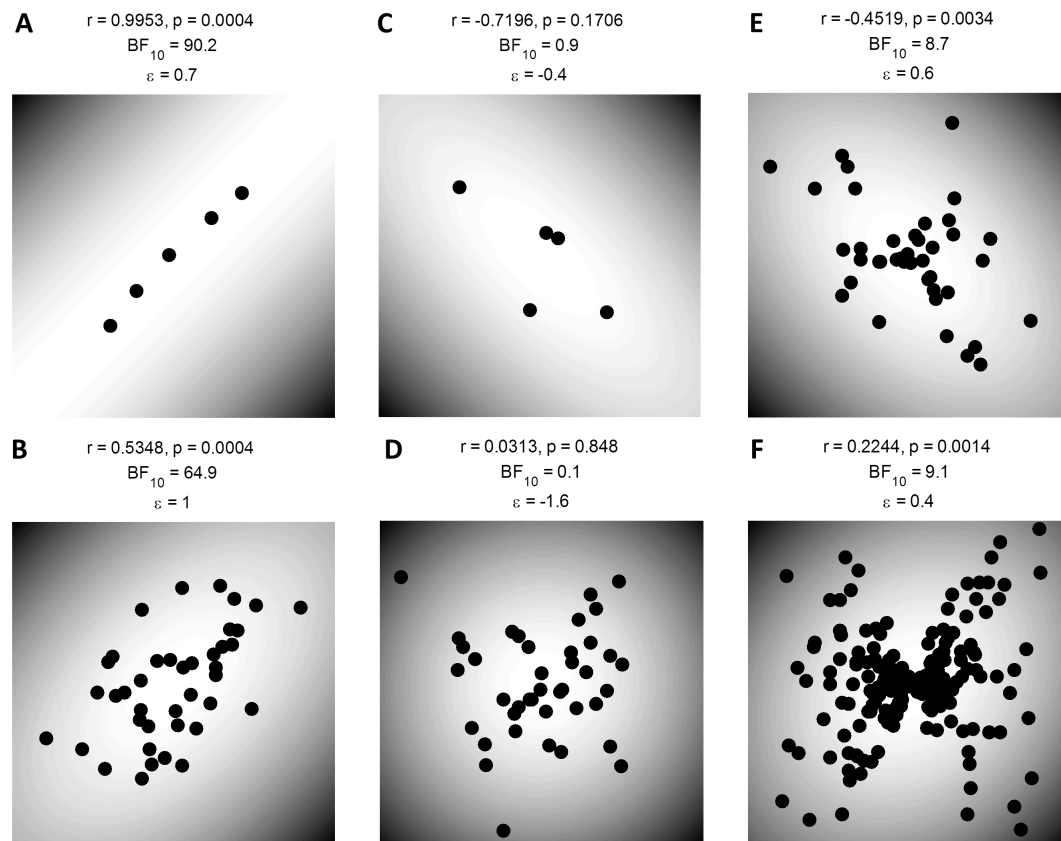

43  
44  
45  
46  
47  
48  
49  
50  
51

**Figure 1.** Scatter plots showing examples of correlation analysis. A-B. Correlated Gaussian data with  $n=5$  (A) and  $n=40$  (B). C-D. Uncorrelated Gaussian data with  $n=5$  (C) and  $n=40$  (D). E-F. Severely heteroscedastic data with  $n=40$  (E) and  $n=200$  (F). Each black dot is one observation. The grey shading denotes the Mahalanobis distance from the bivariate mean. Above each panel the Pearson's correlation coefficient, the default Bayes factor (Wetzels and Wagenmakers, 2012)  $BF_{10}$  comparing the alternative and the null hypothesis, and the bootstrapped evidence  $\epsilon$  are given.

52  
53  
54  
55  
56  
57  
58  
59  
60  
61  
62  
63  
64  
65  
66

One journal went so far as to ban the use of classical inference completely while proposing no viable alternative (Trafimow and Marks, 2015). Others proposed guidelines to focus on effect size estimation and confidence intervals instead (Psychological Science, 2014; Cumming, 2014). However, the use of confidence intervals is also fraught with problems (Morey et al., 2014) and may simply become a new significance testing procedure in disguise (Cumming, 2014; Hoekstra et al., 2014). Moreover, like p-values, confidence intervals are frequently misinterpreted (Hoekstra et al., 2014) and may perform inadequately (Wilcox and Muska, 2001). Evidence for a hypothesis should *compare* an experimental (alternative) hypothesis to a baseline (null) hypothesis. Bayesian hypothesis tests can achieve that but are often difficult to apply and rely on the choice of a prior, which can result in considerable debate (see e.g. (Bem, 2011; Bem et al., 2011; Wagenmakers et al., 2011a, 2011b; Savalei and Dunn, 2015)).

Here I present the *bootstrapped evidence* (BSE) test. It makes minimal assumptions and is applicable to a wide range of situations. Crucially, it quantifies the evidence for either the alternative or the null hypothesis non-dichotomously. Yet unlike Bayesian methods it is based

67 only on the existing data without any question about prior distributions. Simulations demonstrate  
68 the test's efficacy and robustness and compare it to classical frequentist and Bayesian inferential  
69 methods. Further, I apply this test to several concrete examples to show its advantages in  
70 practice. The MATLAB source code and example data are available:  
71 <http://dx.doi.org/10.6084/m9.figshare.1342798>

72

## 73 **Results**

74

75 The principle underlying the BSE test is that under both the alternative ( $H_1$ ) and the null  
76 hypothesis ( $H_0$ ) the results follow a probability distribution (Figure 2, left panels). In classical  
77 statistics, the p-value reflects the distance of the observed effect,  $\theta$  (e.g. a correlation coefficient),  
78 from the center of the null distribution. The one-tailed p-value is the area under the blue curve  
79 (null distribution) to the right of the red diamond, which denotes the observed effect.

80

81 While the null distribution depends on the sample variance, it nonetheless fails to take the  
82 *variability of the effect under  $H_1$*  into account. The BSE estimates how distinct these two  
83 distributions are from one another by bootstrapping both  $H_0$  and  $H_1$  and quantifying  $\Delta$ , the  
84 distribution of differences (Figure 2, right panels), between them (see Materials and Methods). If  
85 the distribution is narrow and shifted away from zero this constitutes evidence for  $H_1$  (Figure 2A).  
86 However, when the distribution is narrow but centered on zero this is instead evidence for  $H_0$   
87 (Figure 2B). A wide  $\Delta$  distribution provides only inconclusive evidence (Figure 2C).

88

89 The BSE is expressed by  $\epsilon$ , which is effectively a *signal-to-noise ratio on a logarithmic scale*. It is  
90 the ratio of the observed effect,  $\mu$ , and the uncertainty,  $\sigma$ , with which it can be estimated (Figure  
91 2 and Materials and Methods). When  $\mu$  is smaller than  $\sigma$  and thus the  $\Delta$  distribution overlaps zero  
92 (as quantified by  $\omega$ ),  $\epsilon$  decreases as sample size,  $n$ , increases. Since  $\epsilon$  is the logarithm of this ratio,  
93 it is positive when the data support  $H_1$  and negative when they favor  $H_0$ . If  $\epsilon$  is near zero ( $-$   
94  $0.5 < \epsilon < 0.5$ ) the evidence is inconclusive.

95

96 For the near perfect correlation with  $n=5$  (Figure 1A) the evidence is only  $\epsilon=0.7$ . In contrast, for  
97 the modest correlation with  $n=40$  the evidence  $\epsilon=1$  (Figure 1B). The data in Figure 1C,D are  
98 uncorrelated and neither correlation would reach classical significance. However, for a small  
99 sample size of  $n=5$  (Figure 1C) the evidence is inconclusive ( $\epsilon=-0.4$ ) while for a large sample  
100 (Figure 1D) the evidence compellingly favors the null hypothesis ( $\epsilon=-1.6$ ).

101

102 The assumption made by parametric tests of normally distributed errors is often violated as in  
103 Figure 1E. Even though the classical p-value is highly significant ( $r=-0.45$ ,  $p=0.0034$ ), the evidence  
104 for  $H_1$  is fairly weak ( $\epsilon=0.6$ ). The reason is that the data are heteroscedastic and thus skew  
105 classical Pearson's correlation: the residuals of a linear fit depend on  $x$ . While  $y$  is chosen from a  
106 random normal distribution each point is also multiplied by the absolute magnitude of its paired  
107 value in  $x$  (Wilcox and Muska, 2001). Such situations can readily occur in real experimental data:  
108 for instance, the proliferation of cell growth or the mean firing rate of neurons may also be  
109 accompanied by greater variability in those measures. This in turn could skew any correlations  
110 between these measures and an independent variable.

111

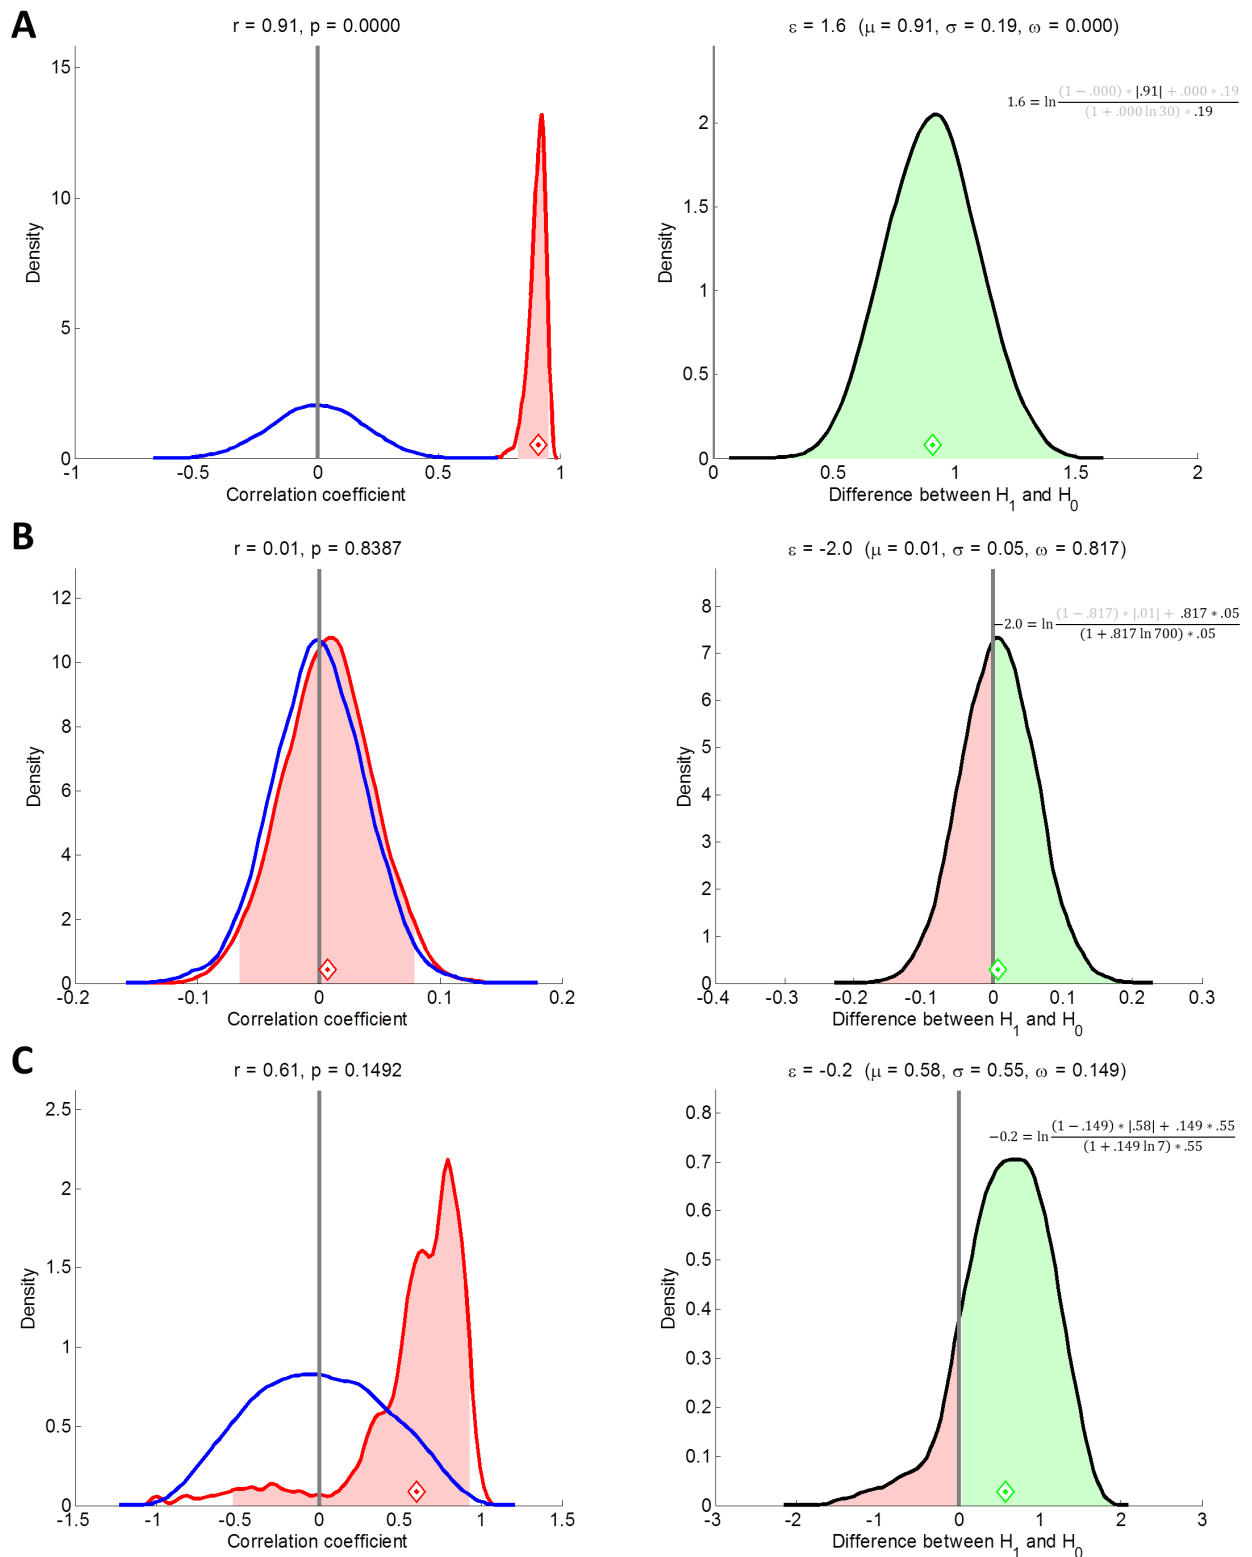

112  
 113  
 114  
 115  
 116

**Figure 2.** Examples of the bootstrapped evidence procedure. *Left panels* show the effect size distribution under the null (blue) and alternative (red) hypothesis estimated by bootstrapping. The red diamond denotes the observed effect size. The red shaded region denotes though the 95% confidence interval of the estimated effect. *Right panels* show the distribution of differences,  $\Delta$ , between the

117 alternative and null distributions (see Materials and Methods). The green diamond denotes the mean,  
118  $\mu$ . The ratio of the red and green areas under the curve is  $\omega$  and quantifies the overlap between the  
119 null and alternative distributions. The standard deviation of  $\Delta$  is denoted by  $\sigma$ . The bootstrapped  
120 evidence,  $\epsilon$ , incorporates these three parameters and the sample size  $n$  and is expressed on a  
121 logarithmic scale (see equation). A. Strongly correlated data with  $n=30$ . Evidence compellingly  
122 supports  $H_1$ . B. Uncorrelated data with  $n=700$ . Evidence compellingly supports  $H_0$ . C. Uncorrelated  
123 data with  $n=7$ . Evidence is inconclusive.

124

125 Notably, even increasing the sample size does not alleviate this problem. The data in Figure 1F  
126 were drawn from the same heteroscedastic population but the sample size is five times larger  
127 ( $n=200$ ) and the correlation is again highly significant ( $r=0.22$ ,  $p=0.0014$ ). Even robust significance  
128 tests, including those specifically developed to control for heteroscedasticity, do not fare any  
129 better (skipped correlation (Wilcox, 2005; Pernet et al., 2012; Rousselet and Pernet, 2012):  $t=4.03$ ,  
130  $t_{\text{critical}}=2.35$ ; permutation test:  $r=0.22$ ,  $p=0.0013$ ; Spearman's rho:  $\rho=0.18$ ,  $p=0.0105$ ; Kendall's tau  
131  $\tau=0.14$ ,  $p=0.0032$ ; percentage bend correlation (Wilcox, 2005):  $r=0.2$ ,  $p=0.0042$ ; Shepherd's pi  
132 (Schwarzkopf et al., 2012):  $\pi=-0.23$ ,  $p=0.0034$ ). In contrast, the BSE test suggests only inconclusive  
133 evidence for  $H_1$  ( $\epsilon=0.4$ ) because bootstrapped distributions for  $H_1$  and  $H_0$  overlap substantially. In  
134 comparison, a homoscedastic data set with the same effect and sample size would produce more  
135 convincing evidence for  $H_1$  ( $\epsilon=0.7$ ).

136

### 137 *Performance on simulated data*

138

139 For a more objective evaluation of the method I ran a series of simulations. For several sample  
140 sizes ( $n=15, 30, 60, 120, 240$ , and  $480$ ) I generated 5,000 data sets each drawn from two different  
141 distributions in which  $H_0$  is true: an uncorrelated bivariate Gaussian and the same heteroscedastic  
142 distribution underlying Figures 1E,F. For each simulated data set I calculated the bootstrapped  
143 evidence,  $\epsilon$ , the classical parametric p-value and a default Bayes factor for  $H_1$  over  $H_0$  ( $BF_{10}$ )  
144 (Wetzels and Wagenmakers, 2012).

145

146 Figure 3A shows the distribution of these inferential statistics for uncorrelated Gaussian data with  
147 the various sample sizes denoted by different colors. As sample size increases the distributions for  
148 the default Bayes factor and bootstrapped evidence become increasingly shifted towards negative  
149 numbers, indicating increasing support for  $H_0$ . In contrast, the distributions for classical p-values  
150 remain the same irrespective of sample size because under  $H_0$  the distribution of p-values is  
151 uniform (because the x-axis is logarithmic this manifests as a long leftwards tail). This ensures  
152 that, provided the assumptions of the test are met, the false positive rate in classical statistics is  
153 constant across sample sizes when  $H_0$  is true. This illustrates why classical *p-values can never*  
154 *provide evidence for the null hypothesis* (Rouder et al., 2009). When  $H_0$  is true, a proportion of  
155 tests given by the  $\alpha$  level will be false positives. Because the estimated effect size with large  
156 sample sizes is typically very small (i.e. close to the truth of zero effect), trivially tiny effects may  
157 thus become statistically significant.

158

159 The grey shaded regions in each panel indicate the boundaries of commonly used criterion levels.  
160 For classical statistics the dark grey region corresponds to p-values between 0.05-0.1, sometimes  
161 called "marginally significant." The light grey region denotes the range between 0.01-0.05. Any p-

162 value to the left of the light grey region would constitute a significant result. For Bayes factors and  
163 the bootstrapped evidence the regions are symmetric around 0. The dark grey region corresponds  
164 to inconclusive evidence that supports neither  $H_1$  nor  $H_0$  (i.e.  $\frac{1}{3}$ -3 for  $BF_{10}$ , -0.5-0.5 for  $\epsilon$ ). The light  
165 grey regions refer to evidence that passed the criterion but which is still relatively weak (i.e.  $BF_{10}$   
166 between  $10^{-1}$  and  $\frac{1}{3}$  or 3 and 10;  $\epsilon$  between -1 to -0.5 or 0.5 to 1). The proportion of these  
167 statistics to the right of the criterion becomes smaller as sample size increases.

168

169 Figure 3B shows results from simulations using the uncorrelated but severely heteroscedastic  
170 distribution. For all sample sizes the distributions for classical p-values are biased so that false  
171 positives are drastically inflated. The same is also somewhat true for the default Bayes factor and  
172 bootstrapped evidence. However, for the BSE the skew is at worst modest, while the proportion  
173 of Bayes factors exceeding “strong” evidence for  $H_1$  is larger. This is because the default Bayes  
174 factor is a function of the Pearson’s correlation coefficient and the sample size. It is therefore  
175 skewed by heteroscedasticity in the same way as classical statistics. However, since the BSE is  
176 based on non-parametric resampling it is less affected by violations of parametric assumptions.

177

178 Next I performed a sensitivity analysis determining how well the BSE test detects true effects. I  
179 repeated the same kind of simulation but now data were chosen from a Gaussian bivariate  
180 distribution with population correlations of  $\rho=0.3$  or  $\rho=0.7$ . Unsurprisingly, for all of the three  
181 procedures the evidence for  $H_1$  becomes stronger as the sample size increases. For  $\rho=0.3$  the  
182 evidence passes criterion only for larger samples sizes (Figure 3C) while for most data both  
183 Bayesian and bootstrapped evidence remains inconclusive. Classical statistics are less  
184 conservative as the peak of the distribution with  $n=120$  (green curve) is already below the  $p<0.01$   
185 threshold. For  $\rho=0.7$  the evidence with most sample sizes passes criterion (Figure 3D).

186

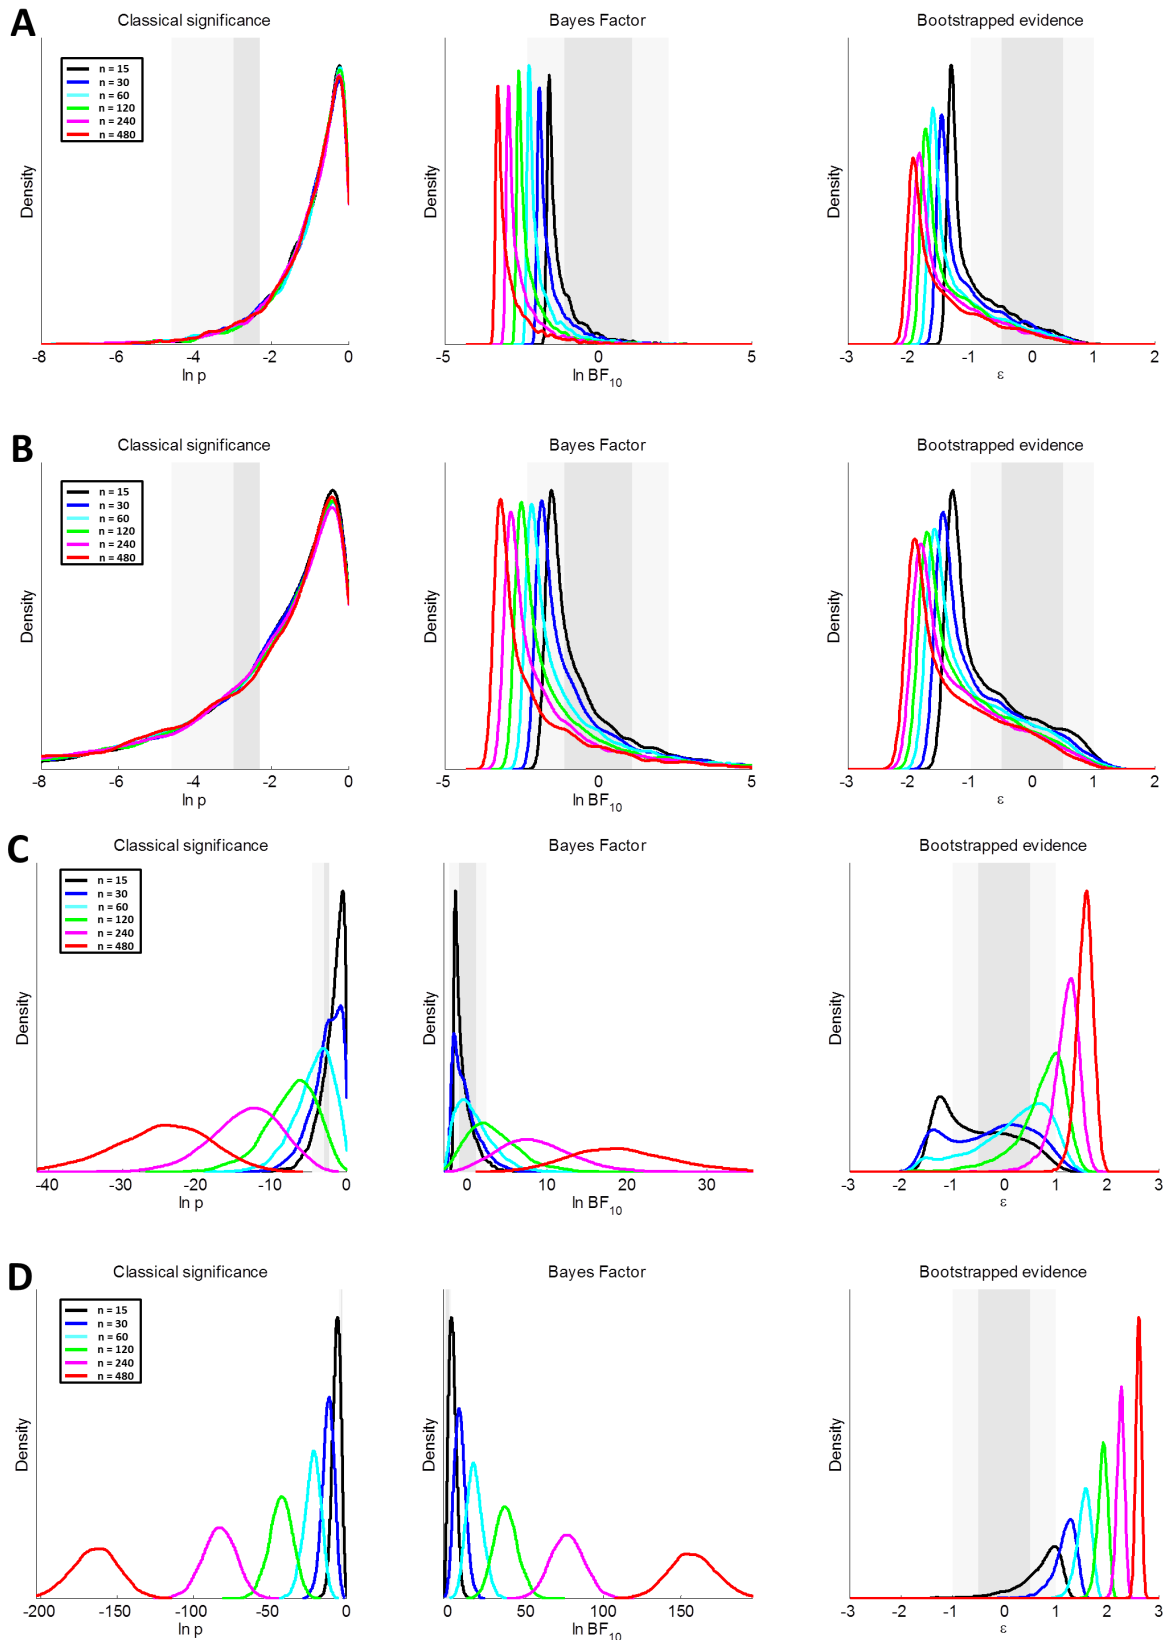

187  
188  
189  
190  
191

**Figure 3.** Distributions of statistical evidence in 5,000 simulations of uncorrelated Gaussian data (A), severely heteroscedastic data (B), weakly correlated data with  $\rho=0.3$  (C) or strongly correlated data with  $\rho=0.7$  (D). Six sample sizes were tested (see color code). Each panel shows distributions for the classical  $p$ -value (left), default Bayes factor (Wetzels and Wagenmakers, 2012)  $BF_{10}$  (middle), and

192 bootstrapped evidence  $\epsilon$  (right). The dark shaded regions denote “inconclusive” results (see text).  
 193 The light shaded regions denote results that pass a basic criterion but provide no strong evidence for  
 194 a given hypothesis.

195

196 I summarized the false positive and correct detection rates as a function of sample size. As  
 197 expected, for classical statistics the false positive rate remains constant near the nominal level of  
 198 5% across all sample sizes, if data are Gaussian and homoscedastic (Figure 4A). For  $BF_{10}$  and  $\epsilon$ ,  
 199 false positive rates for standard criteria ( $BF_{10} > 3$  and  $\epsilon > 0.5$ , respectively) decrease as sample size  
 200 increases. For either method the false positive rate is already below 5% even at the smallest  
 201 sample size ( $n=15$ ). When heteroscedasticity is present, false positives are dramatically inflated:  
 202 approximately one in four tests are positive at  $p < 0.05$  (Figure 4B). Both evidence-based methods  
 203 also show some inflation; however, false positives for the BSE are only about half that for the  
 204 default Bayes factor. For the smallest sample size ( $n=15$ ) the worst false positive rate for  $\epsilon > 0.5$  is  
 205  $\sim 8.5\%$  compared to  $\sim 14.7\%$  for  $BF_{10} > 3$ . When there is a real effect ( $\rho=0.3$ ) the detection rate rises  
 206 steeply and then saturates for all three methods but Bayes factors and BSE are more conservative  
 207 than classical p-values (Figure 4C).

208

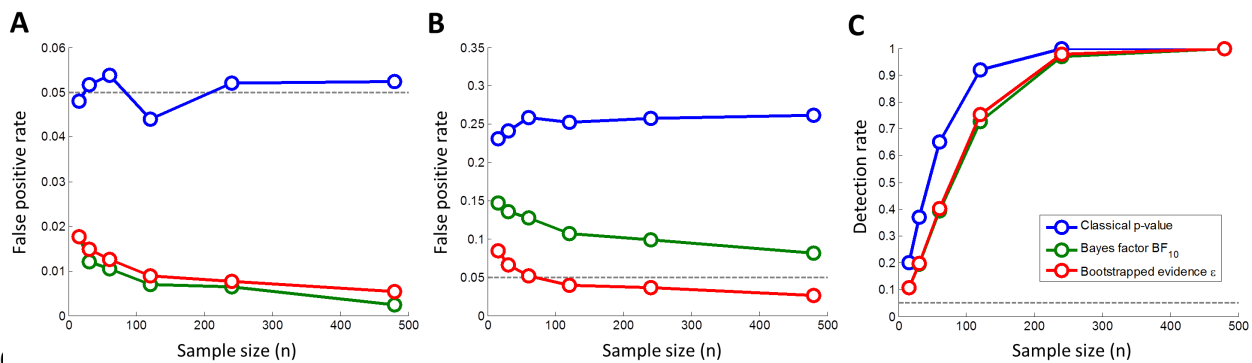

21

210

211 **Figure 4.** Detection rates from the simulations in Figure 3 plotted against sample size for classical  
 212  $p < 0.05$  (blue), default Bayes factor (Wetzels and Wagenmakers, 2012)  $BF_{10}$  (green), and the  
 213 bootstrapped evidence  $\epsilon$  (red). A. Uncorrelated Gaussian data. B. Severely heteroscedastic data. C.  
 214 Correlated data with  $\rho=0.3$ .

215

216 While the conclusions one would draw from all three approaches are usually similar, one notable  
 217 difference is evident between classical and Bayesian inference and the bootstrapped evidence:  
 218 distributions for  $\epsilon$  tend to become *narrower as sample/effect size increase*. In contrast, the  
 219 distributions for p-values and  $BF_{10}$  become wider. Note that all of these plots are on logarithmic  
 220 scales (log-transformation is inherent to the calculation of  $\epsilon$ ; see Figure 2 and Materials and  
 221 Methods). Despite this, the distributions for p-values and Bayes factors display extraordinary  
 222 variability, e.g. the distribution for  $\rho=0.3$  at the largest sample size of  $n=480$  (Figure 3C, red  
 223 curves).

224

225 Here 95% of simulated p-values are between  $8.5 \times 10^{-18}$  and  $1.8 \times 10^{-06}$ . All are highly significant at  
 226  $p < 0.001$  but this range spans many orders of magnitude. The default Bayes factor behaves  
 227 similarly. The equivalent range spans  $BF_{10}$  between 3,212 and 378 quadrillion. Any of these would  
 228 constitute “decisive” evidence of  $BF_{10} > 100$  (Jeffreys, 1961; Wetzels and Wagenmakers, 2012). But  
 229 pragmatically, how much more confident should we be of the highest Bayes factor in this range



230 compared to the lowest? In comparison, the range for the bootstrapped evidence is between 1.2  
231 and 1.9. Again, these are well above even a strict criterion of  $\epsilon > 1$  but there is no stark discrepancy  
232 between the weakest and strongest evidence. Replicate experiments would produce very  
233 consistent evidence for  $H_1$ .

234

235 Naturally, Bayesian analysis depends on the choice of a prior but typically with a range of default  
236 priors the outcome does not vary qualitatively (Wagenmakers et al., 2011b). Nonetheless,  
237 choosing a prior could theoretically also lead to substantial analytic flexibility, thus inflating the  
238 “researcher degrees of freedom” (Simmons et al., 2011). The BSE test on the other hand is  
239 objective. It makes no assumptions beyond the resampling strategy needed for either hypothesis.

240

#### 241 *Evidence as a function of sample size*

242

243 The default Bayes factor also places undue confidence on strong effects when sample sizes are  
244 small as in Figure 1A. The Bayes factor is rather large  $BF_{10} = 90.2$  while the BSE is modest ( $\epsilon = 0.7$ ).  
245 The Bayes Factor reflects how much more probable the data are under  $H_1$  than  $H_0$  (Rouder, 2014).  
246 However, from a pragmatic perspective this must nonetheless lead to an inflation of spurious  
247 results.

248

249 Figure 5 plots the evidence for a range of effect sizes against sample size. The conclusions we  
250 would draw from bootstrapped evidence (Figure 5A) and the default Bayes factor (Figure 5B,C)  
251 are largely the same. For strong effects, the evidence rises continuously beyond the inconclusive  
252 region, while for weaker effects the evidence starts off as indistinguishable from the situation  
253 when the null hypothesis is true (black curves) until it departs and also rises. This behavior is  
254 natural because if the true effect is weaker than what could be meaningfully detected given the  
255 data at hand this constitutes support for the null hypothesis.

256

257 The slopes of the curves for the bootstrapped evidence are far less steep. Thus it is possible to see  
258 the behavior for the full range of conditions within the same plot. There is however one  
259 considerable difference: for a perfect correlation ( $\rho = 1$ ) the default Bayes factor immediately rises  
260 even at tiny sample sizes (Figure 5C). At  $n = 3$  the  $BF_{10}$  is already 48.8. In contrast, the BSE for this  
261 point is low ( $\epsilon = -0.4$ ) and inconclusive. As sample size increases, so does the bootstrapped  
262 evidence. At  $n = 4$  it is still inconclusive but favoring  $H_1$  ( $\epsilon = 0.4$ ). At  $n = 7$  it clearly supports  $H_1$  ( $\epsilon = 0.9$ )  
263 and it continues to rise as sample size increases. This behavior is far more intuitive than that of  
264 the default Bayes factor and also the classical p-value, which would be extremely significant in all  
265 these situations. Compare this to the earlier example of a strong correlation ( $r = 0.9953$ ) with a  
266 small sample size of  $n = 5$  (Figure 1A). Classical inference would be extremely significant ( $p < 0.001$ )  
267 and the default Bayes factor would yield “very strong” evidence for  $H_1$  ( $BF_{10} = 90.2$ ). The BSE is  
268 however only fairly modest, especially given the strong effect ( $\epsilon = 0.7$ ). It is above the criterion for  
269 conclusive evidence but it does not instill undue confidence in  $H_1$ .

270

271 The data in this example were in fact drawn from an uncorrelated Gaussian distribution so the  
272 null hypothesis was true. From a pragmatic perspective at least this is problematic especially given  
273 widespread problems with false positives and reproducibility in the scientific literature (Ioannidis,

274 2005). The bootstrapped evidence provides an intuitive measure of the strength of evidence and  
 275 should thus be a safeguard against weak or inconclusive results.  
 276

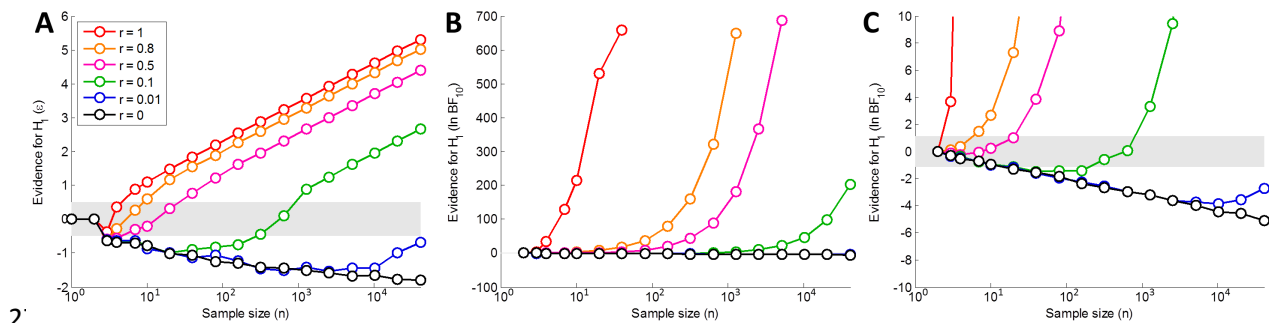

277  
 278  
 279 **Figure 5.** Statistical evidence for H<sub>1</sub> plotted against sample size for a range of effect sizes (see color  
 280 code). Individual panels show the bootstrapped evidence ε (A) or the default Bayes factor (Wetzels  
 281 and Wagenmakers, 2012) BF<sub>10</sub> (B,C). Panel C replots the Bayes factor with y-axis zoomed in on zero.  
 282 The shaded grey region denotes “inconclusive” evidence (i.e. -0.5 < ε < 0.5 or 1/3 < BF<sub>10</sub> < 3, respectively).  
 283 For the bootstrapped evidence (A) these data represent the mean across 100 simulations.  
 284

### 285 Simulations of optional stopping

286  
 287 The BSE test has further advantages over classical inference based on significance thresholds. In  
 288 classical statistics, even when there is no true effect, it is theoretically possible to reach an  
 289 arbitrarily significant p-value, if data collection continues until the p-value passes the significance  
 290 threshold. This is known as “optional stopping”, which is an incorrect but possibly widespread use  
 291 of classical statistics (Masicampo and Lalande, 2012; Lakens, 2015). Under the classical framework  
 292 one should first define the expected effect size *a priori*, perform a power analysis to see how large  
 293 a sample is needed to detect this effect with sufficiently high probability, and then collect those  
 294 data without stopping until the sample is complete. However, typically this is not realistic as one  
 295 can often only make a vague guess about the expected effect size.  
 296

297 The bootstrapped evidence does not suffer from this conundrum. First, even if a dubious optional  
 298 stopping strategy is used, the false positive rate is not inflated substantially. I simulated this 1,000  
 299 times by drawing data repeatedly from an uncorrelated bivariate Gaussian distribution thus  
 300 successively increasing the sample size by 1, starting with a minimal sample of n=5. At each step I  
 301 applied classical statistics, the default Bayes hypothesis test (Wetzels and Wagenmakers, 2012),  
 302 and the BSE test. The first instance one of these tests passed the criterion level, that is p < 0.05 for  
 303 classical statistics, BF<sub>10</sub> > 3 or BF<sub>10</sub> < 1/3 for Bayes factors, and ε > 0.5 or ε < -0.5 for the bootstrapped  
 304 evidence, I recorded the measure of evidence. In addition, I also performed this procedure on the  
 305 bootstrapped uncertainty and recorded the first instance that σ < 0.2. If none of the measures  
 306 reached criterion simulated data collection would cease at n=150.  
 307

308 Under the assumptions of classical statistics this false positive rate should be near 5%, however,  
 309 the actual probability was much greater, 36.4%, illustrating the considerable problems optional  
 310 stopping can cause in classical inference. In contrast, the false positive rates of the evidence-

311 based methods was much lower and well below the classical  $\alpha$  level (Bayes factor: 2.9%;  
312 bootstrapped evidence: 2.8%).

313

314 I repeated the same simulation but this time drawing from the heteroscedastic distribution used  
315 in previous examples (Figures 1E,F). Now classical statistics massively inflated support for the  
316 alternative hypothesis with a false positive rate of 84.6%. Default Bayes factors fared a lot better  
317 but are nonetheless strongly skewed (20.6%). For the bootstrapped evidence on the other hand  
318 the false positive rates were only half that (10.3%), again reflecting the fact that it is based on a  
319 non-parametric procedure that takes into account the anomalous distribution of the data.

320 This demonstrates that optional stopping based on symmetric evidence is far less problematic  
321 than for classical statistics. In particular, sequential analysis until the bootstrapped evidence  
322 reaches conclusive support for either  $H_1$  or  $H_0$  results in only minimal false positive rates even in  
323 extreme situations. However, there is an even better optional stopping strategy that could be  
324 employed in the bootstrapped evidence framework. When data collection continued until the  
325 bootstrapped uncertainty,  $\sigma$ , was 0.2, the false positive rate for using  $\epsilon > 0.5$  in the first scenario  
326 (homoscedastic Gaussian data) was only 1.3%, while for the heteroscedastic data it was 7.9%. This  
327 suggests that using a criterion uncertainty level is the most optimal strategy for minimizing  
328 spurious findings in sequential analysis.

329

330 *Example 1: Anscombe's quartet*

331

332 Simulations are crucial for testing a method's performance because the ground truth is known.  
333 However, for illustration I also apply the method to Anscombe's quartet (Anscombe, 1973) a  
334 famous demonstration of the pitfalls of correlation analysis. It consists of four data sets, each  
335 comprising 11 pairs of variables, in which Pearson's correlation produces (almost) identical results  
336 ( $r=0.82$ ,  $p=0.002$ ). Applying the BSE test reveals that while the data afford low but sufficient  
337 confidence for the correlation in the first three data sets (Figure 6A-C), in the final example  
338 (Figure 6D) the evidence clearly supports  $H_0$  ( $\epsilon=-1.4$ ) because one influential outlier drives the  
339 correlation but the remaining data are uncorrelated.

340

341 Interestingly, the confidence in  $H_1$  is actually subtly greater ( $\epsilon=1$ ) for the third example (Figure 6C)  
342 than the first ( $\epsilon=0.9$ , Figure 6A). This is because a single outlier contaminates the perfect  
343 correlation in this example, whereas the first example contains noisy but normally distributed  
344 data.

345

346 The BSE does not distinguish strongly between the first and second examples (Figure 6A,B). The  
347 second example contains a perfect relationship between  $x$  and  $y$ ; however, it does not conform to  
348 the linear relationship assumed by Pearson's correlation. Curve fitting can also be implemented in  
349 the BSE framework (see Materials and Methods). Here we could compare a simple linear fit to  
350 polynomial curves. The evidence for  $H_1$  with a second-order polynomial is considerably greater  
351 ( $\epsilon=1.6$ ) than for a standard linear model ( $\epsilon=1$ ). Interestingly, the BSE is also robust to overfitting  
352 more complex models: the evidence for higher-order polynomials is weaker than for the second-  
353 order (third-order:  $\epsilon=1.3$ ; fourth-order:  $\epsilon=1$ ).

354

355

356 *Example 2: Links between visual cortex surface area and perceptual function*

357

358 I further applied the BSE test to published experimental data that showed correlations between  
359 the size of early visual areas and perceptual function. These studies hypothesized that the  
360 transmission speed/strength of lateral connections running tangential to the cortical surface is  
361 reduced for individuals with larger cortical surface areas. In the first two studies, this should  
362 manifest as an anti-correlation between the strength of the Ebbinghaus illusion and V1 surface  
363 area (Schwarzkopf et al., 2011; Schwarzkopf and Rees, 2013). Classical statistics confirmed this  
364 hypothesis in both studies (Figure 6E,F). However, according to the BSE the findings of the initial  
365 study were inconclusive ( $r=-0.4$ ,  $p=0.028$ ,  $\epsilon=0.3$ ). The second study used a more sophisticated  
366 design producing more compelling evidence for this link ( $r=-0.38$ ,  $p=0.006$ ,  $\epsilon=0.7$ ; note, however,  
367 that this study also normalized V1 area by the whole cortical surface area to control for non-  
368 linearity issues and other confounds. For the sake of consistency with the other findings I chose  
369 not to apply this correction here).

370

371 The third study (Genç et al., 2014) reported a linear relationship between the speed of travelling  
372 waves in binocular rivalry and the surface areas of V1 and V2. Classical statistics were very similar  
373 for both regions ( $r=0.67$ ,  $p=0.0001$ ). However, the bootstrapped evidence was in fact greater for  
374 V2 (Figure 6G;  $\epsilon=1.1$ ) than V1 (Figure 6H;  $\epsilon=1.1$ ), possibly because an influential outlier affected  
375 the latter.

376

377 *Other statistical tests*

378

379 The BSE test can also address many other questions. One simply needs to change how the effect  
380 size is calculated and how data are resampled during bootstrapping (see Materials and Methods).  
381 For example I also ran simulations for comparing the means of two samples (Supplementary  
382 Figures 1 and 2).

383

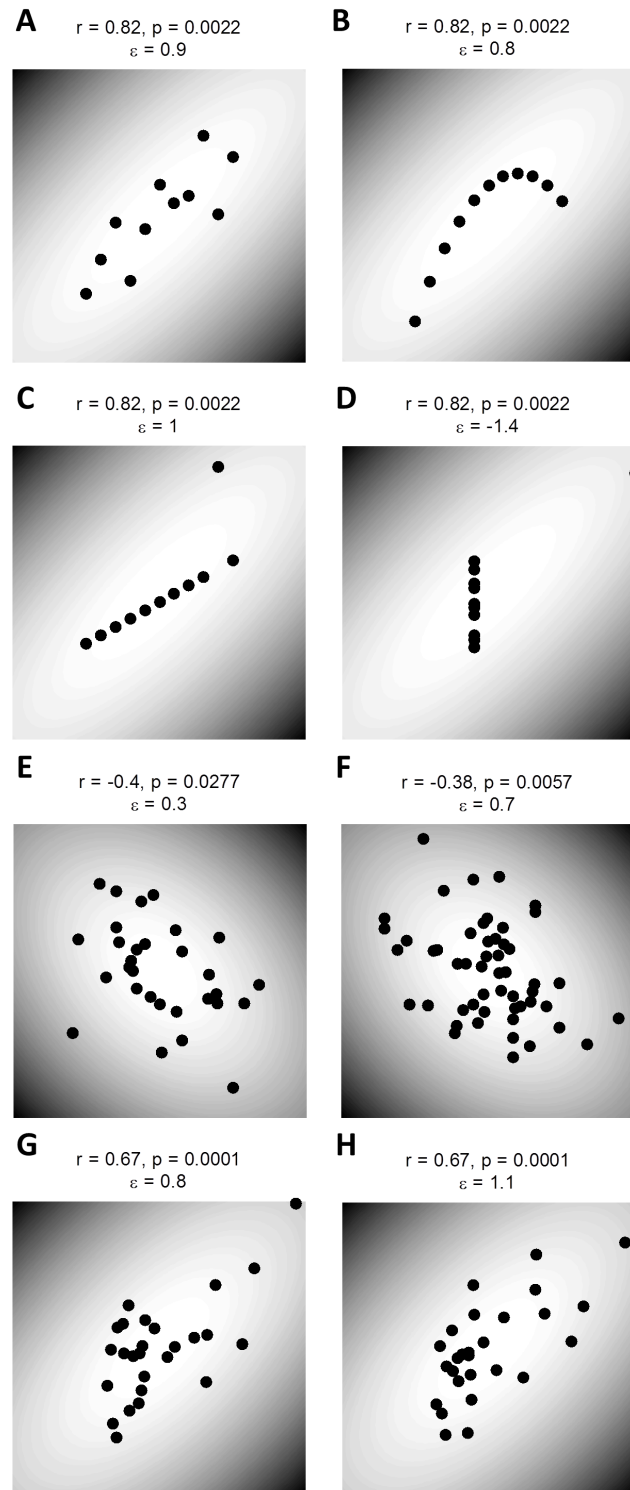

384  
385  
386  
387  
388  
389  
390  
391

**Figure 6.** Example data sets. A-D. Anscombe's quartet: Each data sets has approximately the same Pearson's correlation ( $r=0.82, p=0.0022$ ) and thus all have a default Bayes factor (Wetzels and Wagenmakers, 2012)  $BF_{10} \approx 23$ . Panels show Typical Gaussian data (A), data showing a perfect non-linear relationship (B), a perfect correlation contaminated by one influential outlier (C) and uncorrelated data contaminated by one influential outlier (D). E-H. Experimental data showing correlations between visual cortical surface area and perceptual function. Correlations between V1 area and Ebbinghaus illusion strength from (Schwarzkopf et al., 2011) (E) and (Schwarzkopf and

392 Rees, 2013) (F). Correlations from (Genç et al., 2014) between travelling wave speed in binocular  
 393 rivalry and the surface areas of V1 (G) and V2 (H). All other conventions as in Figure 1.

394

395 *Example 3: reassessing evidence for precognition*

396

397 A few years ago a psychology study reported experimental evidence for the proposition that  
 398 participants had precognitive abilities (Bem, 2011). This study was criticized as an illustration of  
 399 the shortcomings of classical inference: Bayesian reanalysis found little evidence in favor of  
 400 precognition (Wagenmakers et al., 2011b). However, a Bayesian analysis by the original author  
 401 supported his claims (Bem et al., 2011). The conclusions are evidently dependent on the exact  
 402 prior chosen (Wagenmakers et al., 2011a, 2011b). A cautious prior seems advisable when  
 403 evaluating such unusual claims but the debate illustrates how Bayesian inference can appear to  
 404 lack objectivity.

405

406 Here I reevaluate claims from a more recent study on precognitive abilities (Maier et al., 2014)  
 407 with the BSE test (see Materials and Methods). It is a perfect test of the method because these  
 408 results seem biologically and physically implausible but both classical and default Bayesian  
 409 inference (Wagenmakers et al., 2011b) nonetheless support the alternative hypothesis for several  
 410 of the studies (Table 1). In contrast, the BSE does not provide convincing support for precognition.  
 411 It is noteworthy that despite a large sample size of 1222 participants, even the web-based study 3  
 412 only produced inconclusive evidence ( $\epsilon = -0.1$ ). This illustrates that in comparison to classical  
 413 inference, the BSE is far less susceptible to the inflation of “significant” findings with large sample  
 414 sizes. Taken together this suggests that the available data do not provide conclusive evidence for  
 415 either  $H_1$  or  $H_0$ .

416

| Experiment           | Classical statistics                       | Bayes Factor, $BF_{10}$                    | Bootstrapped evidence, $\epsilon$        |
|----------------------|--------------------------------------------|--------------------------------------------|------------------------------------------|
| Maier Study 1        | <b>t(110)=-2.65, p=0.0092</b>              | 2.9 (anecdotal $H_1$ )                     | 0.2 (inconclusive)                       |
| Maier Study 2        | <b>t(200)=-2.99, p=0.0032</b>              | <b>5.9 (moderate <math>H_1</math>)</b>     | 0.3 (inconclusive)                       |
| Maier Study 3        | <b>t(1221)=-2.36, p=0.0186</b>             | 0.5 (anecdotal $H_0$ )                     | -0.1 (inconclusive)                      |
| Maier Unsuccessful 1 | t(62)=0.16, p=0.8700                       | 0.14 (moderate $H_0$ )                     | -1.8 (compelling $H_0$ )                 |
| Maier Unsuccessful 2 | t(405)=0.44, p=0.6587                      | 0.06 (strong $H_0$ )                       | -1.8 (compelling $H_0$ )                 |
| Maier Unsuccessful 3 | t(639)=-1.3, p=0.1943                      | 0.1 (strong $H_0$ )                        | -0.3 (inconclusive)                      |
| Maier Study 4        | t(326)=-1.81, p=0.0717                     | 0.3 (strong $H_0$ )                        | -0.2 (inconclusive)                      |
| Aspirin study*       | <b>t(21998)=5.19, p&lt;10<sup>-6</sup></b> | <b>10561.9 (decisive <math>H_1</math>)</b> | <b>1.3 (compelling <math>H_1</math>)</b> |

417

418 **Table 1.** Reanalysis of data purportedly showing precognitive abilities (Maier et al., 2014) and a  
 419 simulated example of a clinical trial. For each experiment this shows the result using classical statistics, a  
 420 default Bayes factor (Rouder et al., 2009) and the bootstrapped evidence  $\epsilon$ . For Bayes factors and  
 421 bootstrapped evidence verbal descriptions of the strength of evidence for  $H_1$  and  $H_0$  are also given. Cells  
 422 with bold font denote tests formally supporting  $H_1$ , that is, if evidence for the alternative hypothesis is  
 423 above criterion (i.e.  $p < 0.05$ ,  $BF_{10} > 3$  or  $\epsilon > 0.5$ ). All these statistics are based on my own analysis of the raw  
 424 data. Small discrepancies between the present analysis and previously reported results may be because  
 425 statistics were misreported previously although in most cases they are most likely rounding errors. Note  
 426 that the pattern of results is qualitatively the same as in previous reports so these discrepancies do not  
 427 influence the general conclusions in any way. The asterisks indicate that the data for these studies were  
 428 simulated based on the reported effect and sample sizes because the raw data were not available.

429 Is the BSE test simply too conservative to reveal these rather subtle effects? To test whether the  
430 low evidence in my reanalysis could be due to a lack in sensitivity, I also used the BSE test to  
431 evaluate a small effect size in the clinical literature. In this study, the effect of aspirin on cardiac  
432 health was tested in a large sample ( $n \approx 22,000$ ) (Young et al., 1988). The effect was minute  
433 (Cohen's  $d \approx 0.07$ ) but highly significant, and it was thus deemed to be of practical value in  
434 promoting health. In the absence of raw data I simulated this data set using the reported effect  
435 and sample sizes. Here the BSE test agrees with classical statistics and Bayesian inference: the  
436 observed data strongly support ( $\epsilon = 1.3$ ) the efficacy of the drug (Table 1). The sample size in this  
437 case is more than sufficient to conclude that this effect is *small but real*. In contrast, to provide  
438 conclusive evidence for the tiny precognition effects, the sample sizes would have to be orders of  
439 magnitude larger (Supplementary Figure 2).

440

## 441 Discussion

442

443 Here I outlined the bootstrapped evidence test, which makes minimal assumptions and is easily  
444 applicable to numerous situations. It quantifies non-dichotomously the evidence *for the*  
445 *alternative or the null hypothesis* rather than whether a particular statistic passes an arbitrary  
446 significance threshold. A result does not stand or fall based on its exact value. Rather it allows us  
447 to express how convincing a result is. This also allows for the use of sequential sampling  
448 strategies, which can greatly benefit research practice especially when there is uncertainty about  
449 the expected effect size.

450

451 A possible criticism of non-dichotomous alternatives to null hypothesis significance testing is that  
452 any measures could be subject to the same thresholding dilemma as classical p-values. If the  
453 consensus emerges that  $\epsilon > 0.5$  is sufficient evidence for  $H_1$  then are we not merely shifting the  
454 problem from p-values to a different measure? However, even in the classical framework many  
455 researchers regularly make non-dichotomous judgments based on p-values. "Marginally  
456 significant" findings are often reported that do not quite pass reach  $p < 0.05$ . Many researchers are  
457 probably more convinced by  $p = 10^{-17}$  than  $p = 0.049$ . The bootstrapped evidence test directly  
458 quantifies the reliability of the data in drawing conclusions about the two competing hypotheses.  
459 Being a new measure it will make it easier for researchers to adopt non-dichotomous thinking  
460 than with p-values.

461

462 It remains unclear in how far researchers need dichotomous thresholds for statistical inference  
463 and whether labels for the strength of evidence, such as those employed for Bayes factors  
464 (Jeffreys, 1961; Wetzels and Wagenmakers, 2012), are necessary. I would argue that they are not  
465 and deliberately refrained from proposing a categorical stratification of  $\epsilon$ . For replication attempts  
466 or incremental experiments for which clear predictions can be made,  $\epsilon$  between 0.7-1 can already  
467 be very convincing. In contrast, for more extraordinary claims even  $\epsilon = 1$  is still low.

468

469 Another problem with most commonly used statistics is that they are based on parametric  
470 assumptions that may not hold. Anomalous data can skew the default Bayes factor to a similar  
471 extent as inferences based on classical p-values, because it is based on the same effect size  
472 calculations. Robustness to outliers and heteroscedasticity could be incorporated into Bayesian  
473 hypothesis testing, e.g. by outlier removal procedures. Within the framework of classical

474 inference robust hypothesis testing suggest following a complicated tree of tests for the presence  
475 of outliers and heteroscedasticity, and then applying the appropriate robust test depending on  
476 the situation (Wilcox, 2005; Pernet et al., 2012). This is often accompanied by remonstrations that  
477 there is a “statistical toolbox” that should be employed and that one method is not best for every  
478 situation (Gigerenzer and Marewski, 2015).

479

480 While it is doubtless true that inference should never be made without thought (Gigerenzer,  
481 2004), it is nevertheless advisable to seek a method that serves a universal purpose because in  
482 practice many researchers are not statisticians. The idea of a “statistical toolbox” is fraught with  
483 danger. It must inevitably result in increasing the underreported flexibility in the range of  
484 methods employed by published studies (Simmons et al., 2011; Wagenmakers et al., 2012). Of  
485 course the BSE test does not preclude the use of other statistical methods. It simply provides a  
486 common starting point for inference. It is an objective method with minimal assumptions that in  
487 principle works exactly the same for almost any situation.

488

## 489 **Materials and Methods**

490

491 I will refer to the distributions for the effect size under null and alternative hypothesis as  $\theta_0$  and  
492  $\theta_1$ , respectively (Figure 2, left panels, blue and red curves). To quantify the *similarity* of these two  
493 distributions at each bootstrapping step the difference between the effects under the two  
494 hypotheses is calculated, that is,  $\theta_{1i} - \theta_{0i}$  where  $i$  denotes the  $i$ -th bootstrap step. This produces a  
495 *distribution of differences*,  $\Delta$ , between the effects expected under the two hypotheses (Figure 2,  
496 right panels). Theoretically, the evidence for  $H_1$  is thus a kind of standardized score based on this  
497  $\Delta$  distribution:

498

$$z = \frac{|\mu|}{\sigma} \tag{1}$$

499

500

501 where  $\mu$  and  $\sigma$ , respectively, denote the arithmetic mean and standard deviation of  $\Delta$ . This  
502 effectively normalizes the shift of this distribution relative to zero by its dispersion. When  $z$  is  
503 greater than 1 this implies that the sample effect size, and thus our estimate of the true  
504 population effect, is larger than the *uncertainty* of the estimate (Figure 2A). This provides  
505 evidence supporting the alternative hypothesis. The more data we collect and the sample size,  $n$ ,  
506 becomes larger, the more accurate is the estimate of the population effect,  $\mu$ , and the smaller is  
507 the uncertainty,  $\sigma$ .

508

509 Unfortunately, this only holds when the alternative hypothesis is in fact true. When the null  
510 hypothesis is true instead, that is, when the population effect is zero, the parameters of  $\Delta$  do not  
511 reflect the evidence for  $H_0$ . While increasing  $n$  reduces the uncertainty,  $\sigma$ , on average it also  
512 reduces estimates of the absolute population effect size,  $\mu$ . It follows that the ratio of these  
513 parameters,  $z$ , remains more or less constant.

514



515 Thus, in order to quantify how strongly the data support *either*  $H_1$  or  $H_0$  we must weight the ratio  
516 of  $\mu$  and  $\sigma$  according to how much evidence is available. This is achieved by calculating a third  
517 parameter describing the overlap of  $\theta_0$  and  $\theta_1$ . This is given by:  
518

$$\omega = \frac{P(\Delta \operatorname{sgn} \mu \leq 0)}{P(\Delta \operatorname{sgn} \mu > 0)} \quad (2)$$

519  
520  
521 That is, dividing the proportion of bootstraps in  $\Delta$  that have the opposite sign as  $\mu$  or zero (red  
522 area under the curves in the right panels of Figure 2) by the proportion of iterations with the  
523 same sign (green area under the curves in the right panels of Figure 2). The strength of evidence,  
524  $\varepsilon$ , for or against  $H_1$  is then calculated as:  
525

$$\varepsilon = \ln \frac{(1 - \omega)|\mu| + \omega\sigma}{(1 + \omega \ln n)\sigma} \quad (3)$$

526  
527  
528 While this equation may seem complex, it is essentially the same as  $z$ , the standardized score in  
529 equation 1, but it is moderated by the sample size and the overlap between  $\theta_1$  and  $\theta_0$ . When the  
530 data clearly support the alternative hypothesis, the  $\Delta$  distribution is shifted far away from zero  
531 and thus  $\omega$  (the ratio of the red and green areas under the curve) is very small (Figure 2A). In fact,  
532 because it is based on the proportion of bootstraps it may even be 0. Under these circumstances  
533 the denominator is close to  $\sigma$ , the numerator is close to  $|\mu|$ , and thus the evidence is  
534 approximately  $z$ . However, when the null hypothesis is true, or the effect size is too small to  
535 clearly support the alternative, the  $\Delta$  distribution is centered near zero and thus  $\omega$  is  
536 approximately 1. In this situation the denominator is a multiple of  $\sigma$ , growing ever larger as the  
537 sample size increases. This in turn ensures that the ratio in equation 3 becomes ever smaller and  
538 evidence for the null hypothesis grows (Figure 2B).

539  
540 The numerator is also moderated by the strength of the evidence. When  $H_0$  is true and  $\omega$  is near  
541 1, the numerator is close to  $\sigma$ . This reflects the fact that when the data provide only weak  
542 evidence, there is substantial uncertainty as to whether the estimate of the effect size is accurate.  
543 When the sample size is large, this means that the denominator dominates the equation and  $\varepsilon$   
544 becomes very small. However, when the sample size is *small*, the ratio is close to 1 and thus the  
545 data support neither  $H_1$  nor  $H_0$  very clearly – this means the evidence is inconclusive (Figure 2C).

546  
547 To recap, the bootstrapped evidence,  $\varepsilon$ , measures how confident one can be of the effect size  
548 estimate given the uncertainty in the data. If the observed effect is relatively large, the  
549 uncertainty will decrease as sample size grows and thus support for the alternative hypothesis  
550 also grows. However, when the effect remains considerably smaller than the uncertainty, a larger  
551 sample instead provides greater evidence for the null hypothesis.

552  
553 Finally, as equation 3 shows,  $\varepsilon$  is the natural logarithm of this ratio. Therefore, when the ratio is  
554 near 1 and the evidence is inconclusive,  $\varepsilon$  is approximately 0. Positive  $\varepsilon$  indicates evidence for  $H_1$ ,  
555 while negative  $\varepsilon$  indicates evidence for  $H_0$ . The bootstrapped evidence thus provides a non-

556 dichotomous measure of the evidence for either hypothesis, similar to a Bayes factor  
557 (Wagenmakers, 2007; Rouder et al., 2009; Dienes, 2014). However, while a Bayes factor is a  
558 measure of how much one should update the prior odds due to the observed evidence, the  
559 bootstrapped evidence is in essence a signal-to-noise ratio. A strong “signal” implies strong  
560 evidence for  $H_1$ , while a negligible signal with a lot of data provides strong evidence for  $H_0$ . The  
561 only prior assumptions this procedure makes pertain to how the data are resampled under the  
562 two hypotheses.

563

#### 564 *Bootstrapped correlations*

565

566 To bootstrap the evidence for a linear correlation data are resampled *with replacement* and on  
567 each step the correlation coefficient is computed. To derive the null distribution ( $\theta_0$ ) data are  
568 resampled without restriction as would be expected if the effect occurred by chance, that is,  
569 observations for the two variables are no longer paired but intermixed randomly. This is  
570 essentially standard procedure for non-parametric resampling methods in the classical frequentist  
571 framework (although for this purpose permutation analysis where resampling is performed  
572 *without* replacement is more common). A classical one-tailed p-value could be calculated by  
573 determining the proportion of bootstraps  $\theta_{0i}$  that are at least as large as the observed effect size –  
574 that is, the area under the blue curve to the right of the red diamond.

575

576 However, to derive the alternative distribution ( $\theta_1$ ), quantifying the reliability of the observed  
577 effect, we restrict the resampling strategy on the alternative hypothesis that there is a  
578 correlation. In this case the pairing of data points in each variable is preserved so many resamples  
579 will show a positive linear relationship.

580

581 As described, we next calculate  $\Delta$ , the distribution of differences between  $\theta_1$  and  $\theta_0$  (Figure 2B). Its  
582 standard deviation is the uncertainty,  $\sigma$ . For all of the examples given in this article, I used 10,000  
583 bootstrap iterations, except in the interest of time for lengthy simulations and curve fitting  
584 examples I only used 1,000 iterations. Reducing the number of iterations only changes the  
585 precision of the estimate of  $\epsilon$  but does not alter the general conclusions substantially.

586

587 The further apart the two distributions for  $\theta_0$  and  $\theta_1$  are, the farther  $\Delta$  is from zero and the greater  
588 is the evidence for  $H_1$ . This is quantified by  $\epsilon$ . When  $\epsilon$  is very negative, the evidence favors  $H_0$   
589 because it means the two distributions for  $\theta_0$  and  $\theta_1$  overlap considerably which means that  $\Delta$  is  
590 centered near zero. Intuitively this indicates that the effect size estimate under  $H_1$  could very  
591 likely have been smaller than that under  $H_0$ . When the evidence is  $-0.5 < \epsilon < 0.5$  this provides  
592 inconclusive support for the either hypothesis. This region is somewhat arbitrary but it reflects  
593 the fact that while there is overlap between the distributions for  $\theta_0$  and  $\theta_1$ , there is not sufficient  
594 data to be confident that there is no subtle effect. This corresponds to the range of  $\epsilon$  one typically  
595 obtains with small sample sizes when the null hypothesis is true.

596

#### 597 *Bootstrapping differences*

598

599 Naturally, the same procedure can be applied to other statistical comparisons in addition to tests  
600 of correlation. For instance, when *comparing the means of two independent samples* the effect

601 size is the difference between the sample means. To estimate the null distribution,  $\theta_0$ ,  
602 observations are resampled with replacement and divided into new samples of the same size as  
603 the original samples. To estimate the distribution for the alternative hypothesis,  $\theta_1$ , the  
604 segregation of the two samples is maintained and resampling is done *within* each sample. In all  
605 other respects, the procedure is identical to the correlation test already described.

606

607 When testing the *difference between two repeated measures* the same underlying principle  
608 applies. Here the effect size is the mean over the *differences* in each pair of observations. We  
609 estimate  $\theta_1$  by maintaining the pairing but resampling with replacement. For estimating  $\theta_0$  the  
610 pairing is also kept intact because what matters is only the variance across repeated measures.  
611 However, under the null hypothesis the order of measures is irrelevant so the resampling  
612 *randomizes the sign* for each observation. This corresponds to scrambling the order of  
613 observations in a repeated measures design.

614

615 Similarly, the BSE can also be used to test the *difference between two correlations*. Again the data  
616 need to be resampled based on the assumptions of the null as well as the alternative hypothesis.  
617 In this case the null hypothesis resamples data ignoring how variables are paired while the  
618 alternative hypothesis preserves the pairing. The estimated effect size is the difference between  
619 the two correlation coefficients.

620

621 The situation becomes more complicated for testing the *difference of one sample from a fixed*  
622 *value* (e.g., when comparing a normative sample to a patient case-study). Conceptually, it is  
623 possible to use the same resampling strategy as for a repeated measures design: the observations  
624 are the differences from the fixed value and for resampling the null distribution  $\theta_0$  we randomize  
625 the sign of each observation. However, this approach is probably not sufficiently conservative.  
626 While it is conceptually correct for repeated measures designs to assume a mean difference of 0  
627 under the null hypothesis, in many other situations fixed values are themselves subject to  
628 variability and/or measurement error. For instance, a measurement in a case study is subject to  
629 within-subject variability and chance performance in a behavioral task follows a probability  
630 distribution.

631

632 Such variance should be incorporated in the BSE framework to estimate the null distribution more  
633 accurately. Therefore, whenever possible it is advisable to design experiments with a control or  
634 baseline condition against which to test the experimental manipulation. For example, when  
635 testing whether a group of individuals has above average IQ it would make more sense to  
636 compare this sample to a well-matched control group rather than to assume an average IQ of 100.  
637 This is not only useful for the BSE test but is generally good experimental design.

638

639 *Bootstrapping tests against chance*

640

641 Alternatively, the null distribution can also be simulated. This is suitable for testing a binomial  
642 process, such as whether a coin is fair or whether a participant performed better than chance at a  
643 behavioral task. As usual, in each bootstrap step the observed data (e.g. a series of 1s and 0s for  
644 heads or tails) are resampled to obtain the alternative distribution  $\theta_1$ . However, for estimating  $\theta_0$   
645 we instead generate a *new* set of 1s and 0s of the same number as the observed trials using the

646 chance probability (i.e. 0.5 or whatever the chance level is). Alternatively, one can also permute  
647 the raw trial data in each resampling step and recalculate the accuracy. The latter approach is  
648 advised when the design is unbalanced or if there is any suspicion that chance may not have a  
649 binomial distribution. In all other ways the procedure works as described.

650

651 A very similar approach for simulating a chance distribution based on the assumptions underlying  
652 the null hypothesis can also be used for other problems, for example comparing the performance  
653 of a group of participants against chance. In this case, we can simulate  $\theta_0$  by generating a new set  
654 of 'chance' participants at each resampling step under the same conditions as the actual  
655 experiment (same chance probability, number of trials, and number of participants).

656

657 *Bootstrapping curve fits*

658

659 The bootstrapped evidence procedure also affords itself easily for curve fitting or regression  
660 analyses. The estimated effect size in this case is the coefficient of determination,  $R^2$  (or  
661 goodness-of-fit). Otherwise the procedure works in much the same way as for calculating  
662 correlations. Under the null hypothesis the observations for the dependent and independent  
663 variables are scrambled randomly with replacement. Under the alternative hypothesis, the pairing  
664 is kept intact but observations are resampled with replacement.

665

## 666 **Acknowledgements**

667

668 I thank Ged Ridgway, Benjamin de Haas, and Micah Allen for comments on previous versions of  
669 this manuscript. DSS is supported by an ERC Starting Grant.

670

## 671 **References**

672

673 Anscombe, F. J. (1973). Graphs in Statistical Analysis. *Am. Stat.* 27, 17–21. doi:10.2307/2682899.

674 Bem, D. J. (2011). Feeling the future: experimental evidence for anomalous retroactive influences  
675 on cognition and affect. *J. Pers. Soc. Psychol.* 100, 407–425. doi:10.1037/a0021524.

676 Bem, D. J., Utts, J., and Johnson, W. O. (2011). Must psychologists change the way they analyze  
677 their data? *J. Pers. Soc. Psychol.* 101, 716–719. doi:10.1037/a0024777.

678 Cohen, J. (1994). The Earth is round ( $p < .05$ ). *Am. Psychol.* 49, 997–1003.

679 Colquhoun, D. (2014). An investigation of the false discovery rate and the misinterpretation of p-  
680 values. *R. Soc. Open Sci.* 1, 140216. doi:10.1098/rsos.140216.

681 Cumming, G. (2014). The new statistics: why and how. *Psychol. Sci.* 25, 7–29.  
682 doi:10.1177/0956797613504966.

683 Dienes, Z. (2014). Using Bayes to get the most out of non-significant results. *Quant. Psychol.*  
684 *Meas.* 5, 781. doi:10.3389/fpsyg.2014.00781.

- 685 Genç, E., Bergmann, J., Singer, W., and Kohler, A. (2014). Surface Area of Early Visual Cortex  
686 Predicts Individual Speed of Traveling Waves During Binocular Rivalry. *Cereb. Cortex N. Y.*  
687 *N* 1991. doi:10.1093/cercor/bht342.
- 688 Gigerenzer, G. (2004). Mindless statistics. *J. Socio-Econ.* 33, 587–606.  
689 doi:10.1016/j.socec.2004.09.033.
- 690 Gigerenzer, G., and Marewski, J. N. (2015). Surrogate Science The Idol of a Universal Method for  
691 Scientific Inference. *J. Manag.* 41, 421–440. doi:10.1177/0149206314547522.
- 692 Halsey, L. G., Curran-Everett, D., Vowler, S. L., and Drummond, G. B. (2015). The fickle P value  
693 generates irreproducible results. *Nat. Methods* 12, 179–185. doi:10.1038/nmeth.3288.
- 694 Hoekstra, R., Morey, R. D., Rouder, J. N., and Wagenmakers, E.-J. (2014). Robust misinterpretation  
695 of confidence intervals. *Psychon. Bull. Rev.* doi:10.3758/s13423-013-0572-3.
- 696 Ioannidis, J. P. A. (2005). Why most published research findings are false. *PLoS Med.* 2, e124.  
697 doi:10.1371/journal.pmed.0020124.
- 698 Jeffreys, H. (1961). *Theory of probability*. Oxford, UK: Oxford University Press.
- 699 Lakens, D. (2015). What p-hacking really looks like. Available at: <https://osf.io/ycag9/> [Accessed  
700 February 4, 2015].
- 701 Maier, M. A., Buechner, V. L., Kuhbandner, C., Pflitsch, M., Fernandez-Capo, M., and Gamiz-  
702 Sanfeliu, M. (2014). Feeling the Future Again: Retroactive Avoidance of Negative Stimuli.  
703 *J. Conscious. Stud.* 21, 121–152.
- 704 Masicampo, E. J., and Lalande, D. R. (2012). A peculiar prevalence of p values just below .05. *Q. J.*  
705 *Exp. Psychol.* 2006 65, 2271–2279. doi:10.1080/17470218.2012.711335.
- 706 Morey, R. D., Rouder, J. N., Verhagen, J., and Wagenmakers, E.-J. (2014). Why Hypothesis Tests  
707 Are Essential for Psychological Science: A Comment on Cumming (2014). *Psychol. Sci.*  
708 doi:10.1177/0956797614525969.
- 709 Nuzzo, R. (2014). Scientific method: statistical errors. *Nature* 506, 150–152. doi:10.1038/506150a.
- 710 Pernet, C. R., Wilcox, R., and Rousselet, G. A. (2012). Robust correlation analyses: false positive  
711 and power validation using a new open source matlab toolbox. *Front. Psychol.* 3, 606.  
712 doi:10.3389/fpsyg.2012.00606.
- 713 Psychological Science (2014). 2014 Submission Guidelines - Association for Psychological Science.  
714 Available at:  
715 [http://www.psychologicalscience.org/index.php/publications/journals/psychological\\_scie](http://www.psychologicalscience.org/index.php/publications/journals/psychological_science/ps-submissions)  
716 [nce/ps-submissions](http://www.psychologicalscience.org/index.php/publications/journals/psychological_science/ps-submissions) [Accessed April 2, 2014].
- 717 Rouder, J. N. (2014). Optional stopping: No problem for Bayesians. *Psychon. Bull. Rev.*  
718 doi:10.3758/s13423-014-0595-4.
- 719 Rouder, J. N., Speckman, P. L., Sun, D., Morey, R. D., and Iverson, G. (2009). Bayesian t tests for  
720 accepting and rejecting the null hypothesis. *Psychon. Bull. Rev.* 16, 225–237.  
721 doi:10.3758/PBR.16.2.225.

- 722 Rousselet, G. A., and Pernet, C. R. (2012). Improving standards in brain-behaviour correlation  
723 analyses. *Front. Hum. Neurosci.* 6, 119. doi:10.3389/fnhum.2012.00119.
- 724 Savalei, V., and Dunn, E. (2015). Is the call to abandon p-values the red herring of the replicability  
725 crisis? *Cognition* 6, 245. doi:10.3389/fpsyg.2015.00245.
- 726 Schwarzkopf, D. S., De Haas, B., and Rees, G. (2012). Better ways to improve standards in brain-  
727 behavior correlation analysis. *Front. Hum. Neurosci.* 6, 200.  
728 doi:10.3389/fnhum.2012.00200.
- 729 Schwarzkopf, D. S., and Rees, G. (2013). Subjective size perception depends on central visual  
730 cortical magnification in human v1. *PLoS One* 8, e60550.  
731 doi:10.1371/journal.pone.0060550.
- 732 Schwarzkopf, D. S., Song, C., and Rees, G. (2011). The surface area of human V1 predicts the  
733 subjective experience of object size. *Nat. Neurosci.* 14, 28–30. doi:10.1038/nn.2706.
- 734 Simmons, J. P., Nelson, L. D., and Simonsohn, U. (2011). False-positive psychology: undisclosed  
735 flexibility in data collection and analysis allows presenting anything as significant. *Psychol.*  
736 *Sci.* 22, 1359–1366. doi:10.1177/0956797611417632.
- 737 Trafimow, D., and Marks, M. (2015). Editorial. *Basic Appl. Soc. Psychol.* 37, 1–2.  
738 doi:10.1080/01973533.2015.1012991.
- 739 Wagenmakers, E.-J. (2007). A practical solution to the pervasive problems of p values. *Psychon.*  
740 *Bull. Rev.* 14, 779–804.
- 741 Wagenmakers, E.-J., Wetzels, R., Borsboom, D., Kievit, R., and van der Maas, H. L. J. (2011a). Yes,  
742 psychologists must change the way they analyze their data: Clarifications for Bem, Utts, &  
743 Johnson. Available at:  
744 <http://dl.dropbox.com/u/1018886/ClarificationsForBemUttsJohnson.pdf>.
- 745 Wagenmakers, E.-J., Wetzels, R., Borsboom, D., and van der Maas, H. L. J. (2011b). Why  
746 psychologists must change the way they analyze their data: the case of psi: comment on  
747 Bem (2011). *J. Pers. Soc. Psychol.* 100, 426–432. doi:10.1037/a0022790.
- 748 Wagenmakers, E.-J., Wetzels, R., Borsboom, D., Maas, H. L. J. van der, and Kievit, R. A. (2012). An  
749 Agenda for Purely Confirmatory Research. *Perspect. Psychol. Sci.* 7, 632–638.  
750 doi:10.1177/1745691612463078.
- 751 Wetzels, R., and Wagenmakers, E.-J. (2012). A default Bayesian hypothesis test for correlations  
752 and partial correlations. *Psychon. Bull. Rev.* 19, 1057–1064. doi:10.3758/s13423-012-  
753 0295-x.
- 754 Wilcoxon, R. R. (2005). *Introduction to robust estimation and hypothesis testing*. Academic Press.
- 755 Wilcoxon, R. R., and Muska, J. (2001). Inferences about correlations when there is  
756 heteroscedasticity. *Br. J. Math. Stat. Psychol.* 54, 39–47.
- 757 Young, F., Nightingale, S., and Temple, R. (1988). The preliminary report of the findings of the  
758 aspirin component of the ongoing physicians' health study: The fda perspective on aspirin  
759 for the primary prevention of myocardial infarction. *JAMA* 259, 3158–3160.  
760 doi:10.1001/jama.1988.03720210048028.

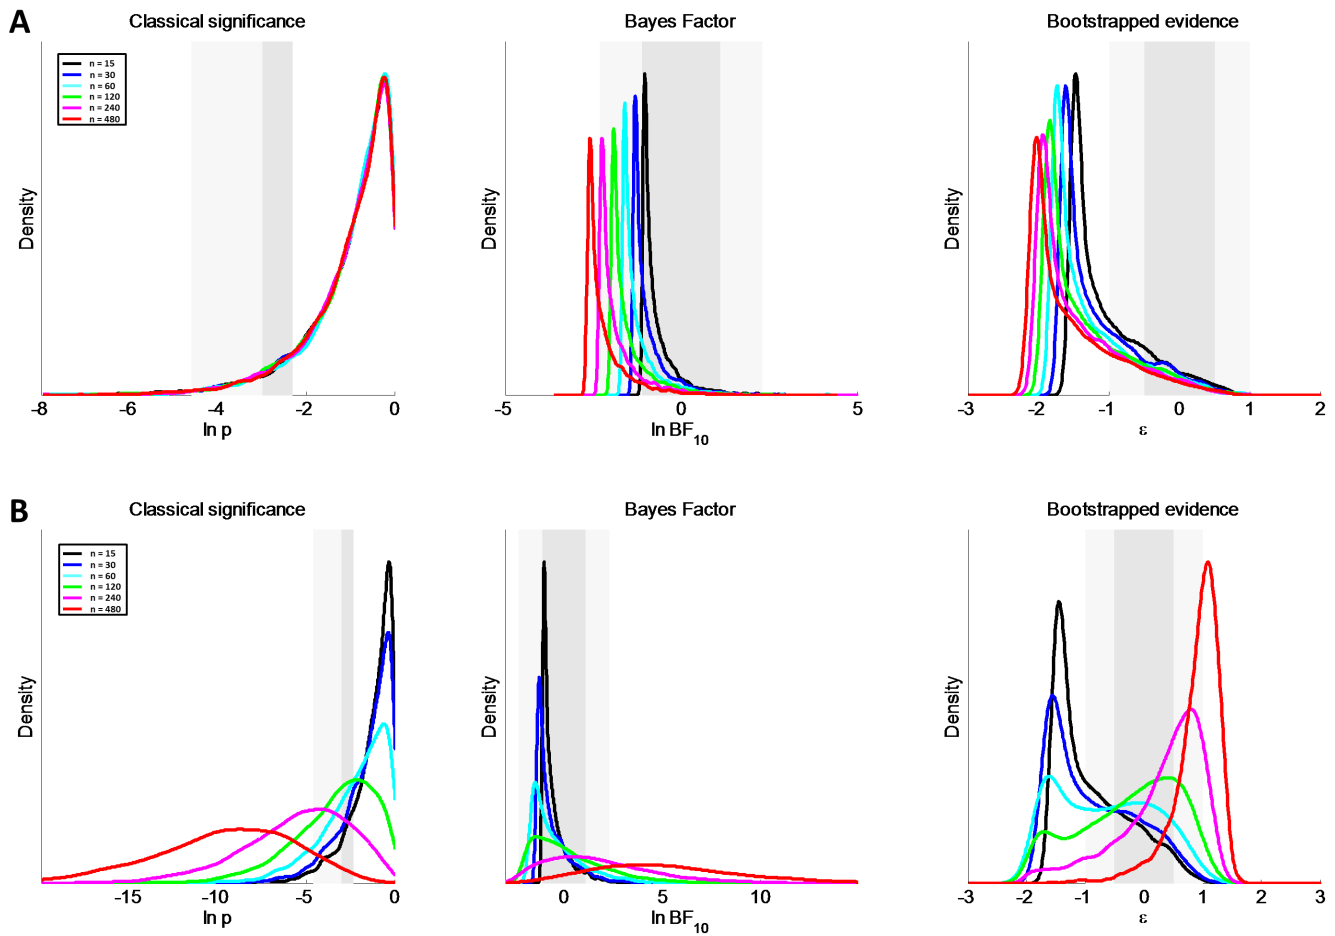

762 **Supplementary Figure 1.** Distributions as shown in Figure 4 but for comparing the means of two samples. A.  
763 No difference, i.e. normally distributed data with unit standard deviation and population mean of 0. B. A  
764 weak effect with a population difference of 0.25 and unit standard deviation. All other conventions as in  
765 Figure 4.

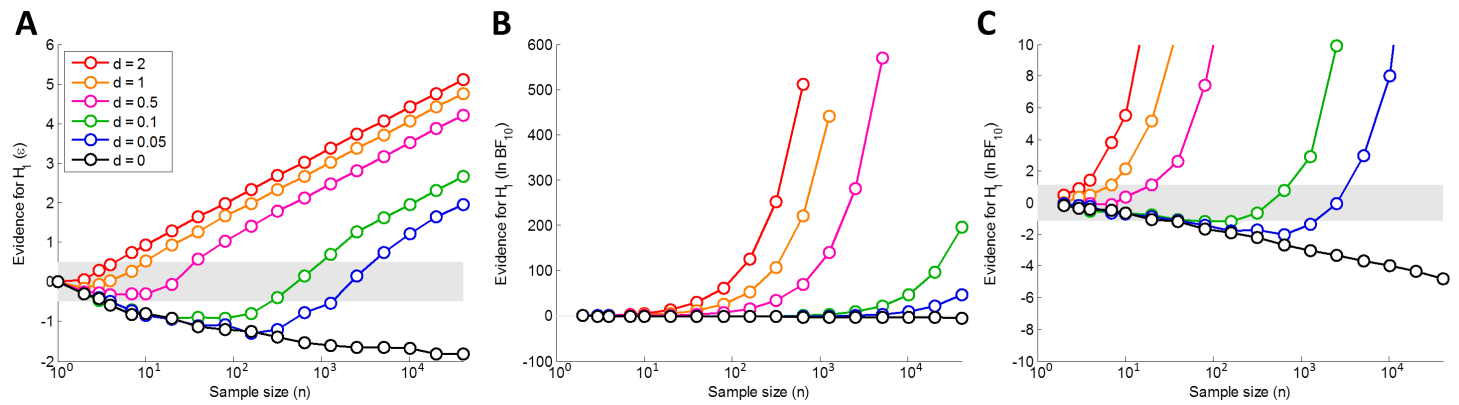

767

768 **Supplementary Figure 2.** Statistical evidence for  $H_1$  plotted against sample size for a range of effect sizes  
769 (see color code) when comparing the means of two samples. Individual panels show the bootstrapped  
770 evidence  $\epsilon$  (A) or the default Bayes factor<sup>1</sup>  $BF_{10}$  (B,C). Panel C replots the Bayes factor with y-axis zoomed in  
771 on zero. The shaded grey region denotes “inconclusive” evidence (i.e.  $-0.5 < \epsilon < 0.5$  or  $\frac{1}{3} < BF_{10} < 3$ , respectively).  
772 For the bootstrapped evidence (A) these data represent the mean across 100 simulations.  
773
